# Supplementary material for: New Insights into the Reaction Paths of Hydroxyl Radicals with Purine Moieties in DNA and Double-Stranded Oligodeoxynucleotides
Source: PubMed Central journal article supplement (PMC6865195; doi:10.3390/molecules24213860), 2019-10-26
Supplement: molecules-24-03860-s001.pdf [file molecules-24-03860-s001.pdf]

*Supplementary Material*

# **New insights into the reaction paths of hydroxyl radicals with purine moieties in DNA and double-stranded oligonucleotides**

Chrysostomos Chatgililoglu\*, Marios G. Krokidis, Annalisa Masi, Sebastian Barata-Vallejo, Carla Ferreri, Michael A. Terzidis, Tomasz Szreder and Krzysztof Bobrowski

\* Correspondence: [chrys@isof.cnr.it](mailto:chrys@isof.cnr.it); Tel.: +39-051-639-8309

## **Table of Contents**

|                         |         |
|-------------------------|---------|
| Figure S1 and Figure S2 | page 2  |
| Figure S3               | page 3  |
| Table S1 and Table S2   | page 4  |
| Table S3 and Figure S4  | Page 5  |
| Figure S5 and Table S4  | Page 6  |
| Figure S6               | Page 7  |
| Table S5 and Figure S7  | Page 8  |
| Figure S8 and Figure S9 | page 9  |
| Table S6 and Table S7   | Page 10 |
| Table S8 and Table S9   | Page 11 |
| Table S10 and Table S11 | Page 12 |
| Table S12 and Table S13 | Page 13 |
| Table S14 and Table S15 | Page 14 |

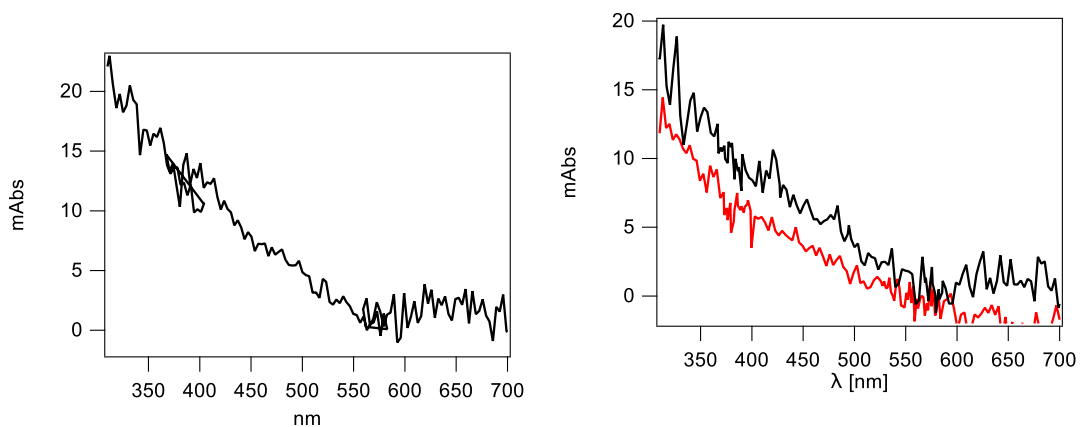

**Figure S1.** Transient absorption spectra recorded using ICCD in  $N_2O$ -saturated phosphate buffered (50 mM) aqueous solutions containing (left panel) 5'-CGA TAC CAT ACG-3' (ODN2) and (right panel) 5'-CGT ACC CCA TCG-3' (ODN4) at natural pH: (—) 1  $\mu$ s and (---) 50  $\mu$ s after electron pulse.

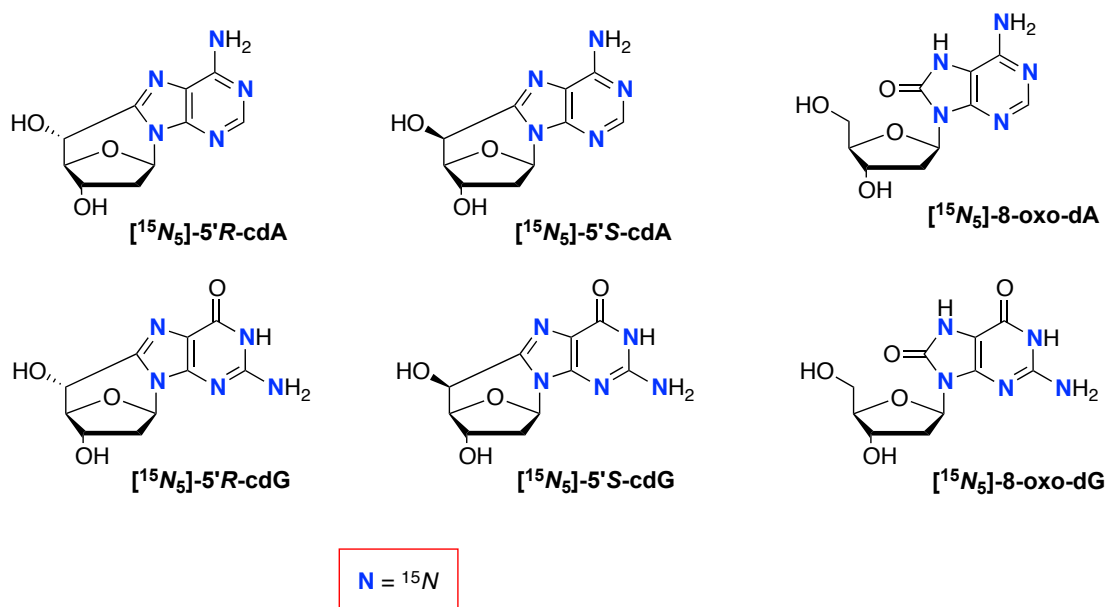

**Figure S2.**  ${}^{15}N$  isotopic labeled compounds.

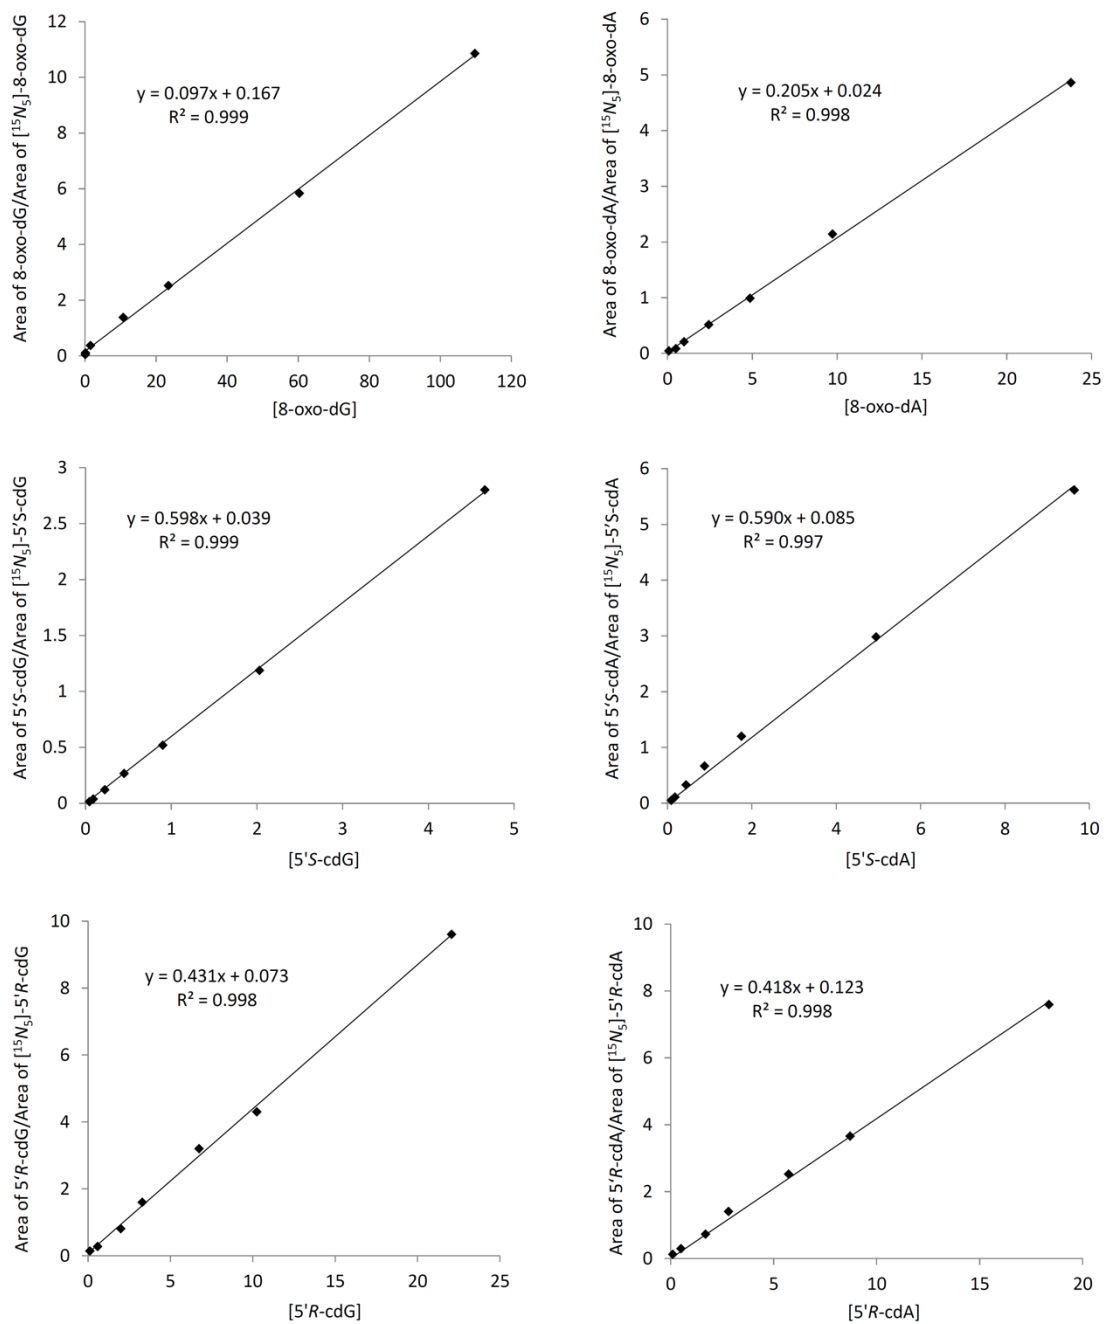

**Figure S3.** Calibration curves for the quantification of the lesions (nM)

**Table S1.** A list of MRM transitions employed for the quantifications of the six oxidatively induced DNA lesions and their corresponding stable isotope-labeled standards.

| Lesions                                   | Precursor ion m/z | Product ion m/z | Collision energy (V) |
|-------------------------------------------|-------------------|-----------------|----------------------|
| 5'R-cdA                                   | 250               | 164             | 14                   |
| [ <sup>15</sup> N <sub>5</sub> ]-5'R-cdA  | 255               | 169             | 14                   |
| 5'S-cdA                                   | 250               | 164             | 16                   |
| [ <sup>15</sup> N <sub>5</sub> ]-5'S-cdA  | 255               | 169             | 16                   |
| 5'R-cdG                                   | 266               | 180             | 18                   |
| [ <sup>15</sup> N <sub>5</sub> ]-5'R-cdG  | 271               | 185             | 18                   |
| 5'S-cdG                                   | 266               | 180             | 16                   |
| [ <sup>15</sup> N <sub>5</sub> ]-5'S-cdG  | 271               | 185             | 16                   |
| 8-oxo-dA                                  | 267               | 151             | 19                   |
| [ <sup>15</sup> N <sub>5</sub> ]-8-oxo-dA | 272               | 156             | 19                   |
| 8-oxo-dG                                  | 284               | 168             | 18                   |
| [ <sup>15</sup> N <sub>5</sub> ]-8-oxo-dG | 289               | 173             | 18                   |

**Table S2:** Total amount of 5'R-cdG, 5'S-cdG, 5'R-cdA, 5'S-cdA, 8-oxo-dG and 8-oxo-dA (lesions/10<sup>7</sup> nucleosides) in DNA applying Procedure (i). The numbers in the boxes represent the mean value ( $\pm$  standard deviation) of DNA lesions levels from the measurement of three samples.

| Dose, Gy | 5'R-cdG         | 5'R-cdA         | 5'S-cdG         | 5'S-cdA        | 8-oxo-dG            | 8-oxo-dA           |
|----------|-----------------|-----------------|-----------------|----------------|---------------------|--------------------|
| 0        | 0.4 $\pm$ 0.01  | 0.2 $\pm$ 0.01  | 0.04 $\pm$ 0.01 | 0.7 $\pm$ 0.25 | 13.3 $\pm$ 0.7      | 2.3 $\pm$ 0.8      |
| 10       | 10.8 $\pm$ 5.3  | 15.2 $\pm$ 6.1  | 3.4 $\pm$ 0.7   | 11.5 $\pm$ 4.5 | 2128.1 $\pm$ 322.5  | 134.4 $\pm$ 16.6   |
| 20       | 24.5 $\pm$ 10.6 | 25.2 $\pm$ 8.2  | 5.5 $\pm$ 1.6   | 25.2 $\pm$ 6.5 | 4542.7 $\pm$ 1503.4 | 341.3 $\pm$ 80.6   |
| 35       | 56.6 $\pm$ 16.1 | 50.9 $\pm$ 13.9 | 10.1 $\pm$ 1.7  | 39.7 $\pm$ 9.5 | 6893.4 $\pm$ 2272.6 | 627.7 $\pm$ 117.5  |
| 50       | 69.5 $\pm$ 20.4 | 80.2 $\pm$ 11.5 | 16.1 $\pm$ 2.6  | 69.0 $\pm$ 4.9 | 9044.2 $\pm$ 1346.6 | 1106.7 $\pm$ 163.9 |

**Table S3:** Total amount of 5'R-cdG, 5'S-cdG, 5'R-cdA, 5'S-cdA, 8-oxo-dG and 8-oxo-dA (lesions/10<sup>7</sup> nucleosides) in DNA applying Procedure (ii). The numbers in the boxes represent the mean value ( $\pm$  standard deviation) of DNA lesions levels from the measurement of three samples.

| Dose, Gy | 5'R-cdG         | 5'R-cdA         | 5'S-cdG         | 5'S-cdA         | 8-oxo-dG            | 8-oxo-dA           |
|----------|-----------------|-----------------|-----------------|-----------------|---------------------|--------------------|
| 0        | 0.4 $\pm$ 0.01  | 0.2 $\pm$ 0.01  | 0.04 $\pm$ 0.01 | 0.7 $\pm$ 0.25  | 14.7 $\pm$ 0.6      | 2.9 $\pm$ 0.7      |
| 10       | 10.6 $\pm$ 6.5  | 14.4 $\pm$ 5.3  | 3.2 $\pm$ 0.6   | 10.9 $\pm$ 3.4  | 1779.1 $\pm$ 445.6  | 142.9 $\pm$ 47.1   |
| 20       | 31.3 $\pm$ 10.1 | 28.4 $\pm$ 10.0 | 7.3 $\pm$ 2.3   | 29.2 $\pm$ 10.9 | 4436.9 $\pm$ 1660.2 | 408.6 $\pm$ 110.8  |
| 35       | 57.7 $\pm$ 10.7 | 54.3 $\pm$ 11.3 | 12.9 $\pm$ 2.3  | 42.2 $\pm$ 5.2  | 6811.2 $\pm$ 1067.1 | 727.0 $\pm$ 204.7  |
| 50       | 61.1 $\pm$ 16.4 | 75.6 $\pm$ 13.3 | 15.1 $\pm$ 2.0  | 64.8 $\pm$ 4.6  | 8126.7 $\pm$ 880.5  | 1096.6 $\pm$ 226.4 |

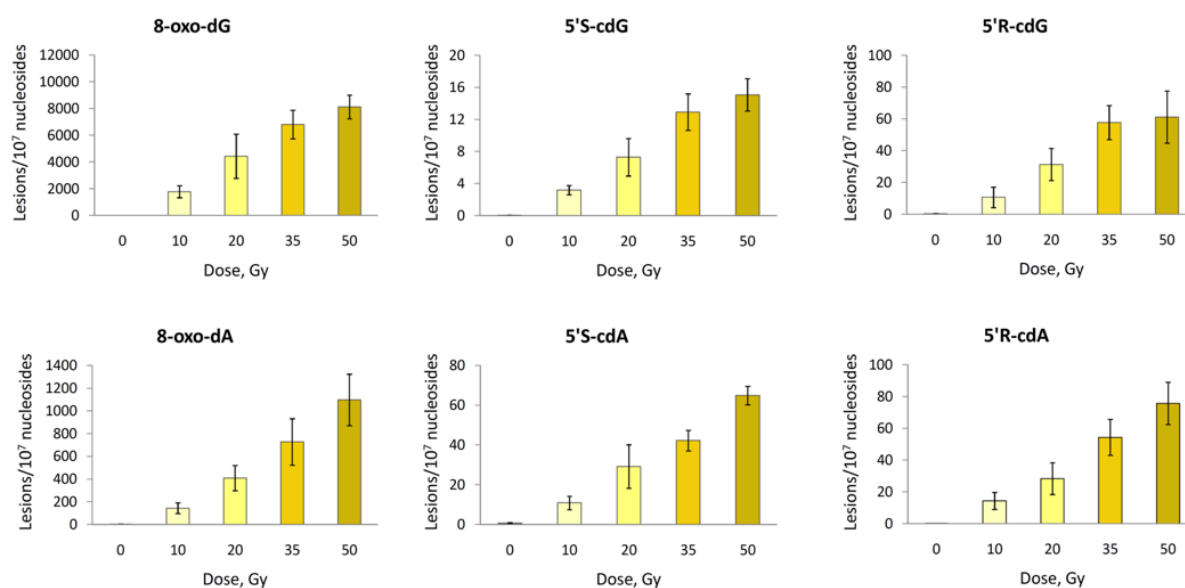

**Figure S4.** Radiation induced formation of 8-oxo-dG, 5'S-cdG, 5'R-cdG, 8-oxo-dA, 5'S-cdA and 5'R-cdA in ct-DNA Procedure (ii). Each sample was exposed to 0 Gy, 10 Gy, 20 Gy, 35 Gy and 50 Gy dose. The values represent the mean  $\pm$  SD of  $n=3$  independent experiments.

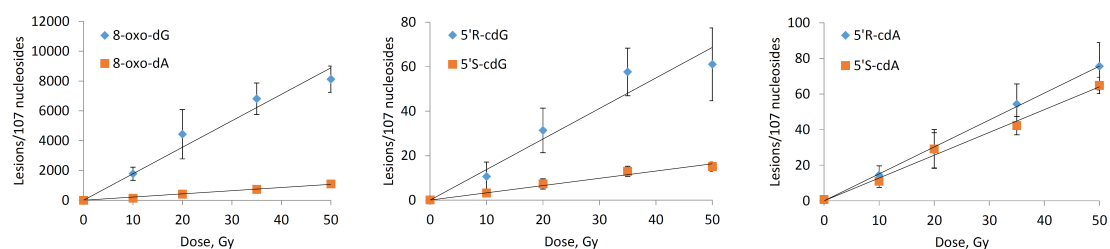

**Figure S5.** Radiation induced formation of 8-oxo-dG, 8-oxo-dA, 5'R-cdG, 5'S-cdG, 5'R-cdA, and 5'S-cdA in ct-DNA; Procedure (ii). Each sample was exposed to 0, 10, 20, 35 and 50 Gy dose in N<sub>2</sub>O-saturated aqueous solutions; The values represent the mean  $\pm$  SD of n=3 independent experiments.

**Table S4:** The levels (lesions/10<sup>7</sup> nu/Gy) of 8-oxo-dG, 8-oxo-dA, 5'R-cdA, 5'S-cdA, 5'R-cdG and 5'S-cdG in calf thymus DNA.

| Lesions  | Procedure (i)                 | Procedure (ii)                |
|----------|-------------------------------|-------------------------------|
|          | lesions/10 <sup>7</sup> nu/Gy | lesions/10 <sup>7</sup> nu/Gy |
| 8-oxo-dG | 177.1 $\pm$ 20.6              | 171.8 $\pm$ 13.0              |
| 8-oxo-dA | 22.3 $\pm$ 1.7                | 22.3 $\pm$ 1.9                |
| 5'R-cdA  | 1.58 $\pm$ 0.13               | 1.53 $\pm$ 0.12               |
| 5'S-cdA  | 1.33 $\pm$ 0.09               | 1.27 $\pm$ 0.08               |
| 5'R-cdG  | 1.48 $\pm$ 0.17               | 1.33 $\pm$ 0.16               |
| 5'S-cdG  | 0.31 $\pm$ 0.02               | 0.31 $\pm$ 0.03               |

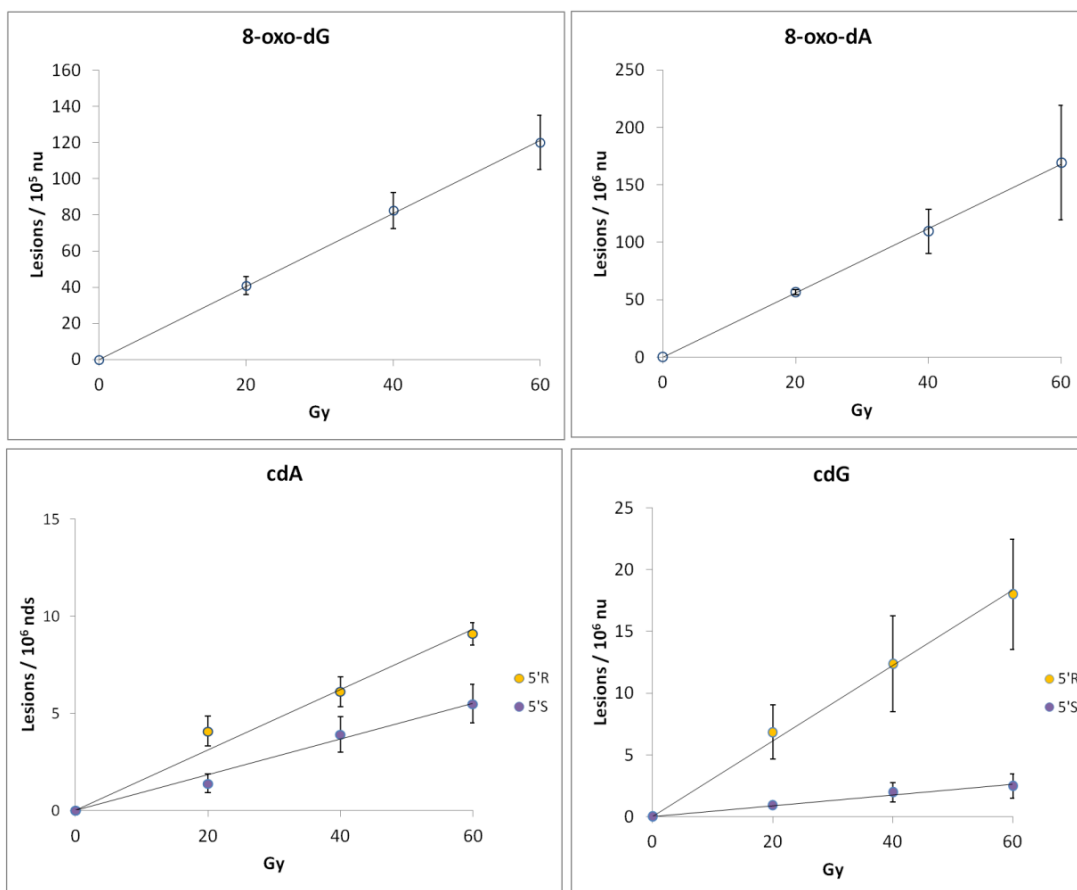

**Figure S6:** Radiation induced formation of 8-oxo-dG, 8-oxo-dA, (5'R ●, 5'S ●) and cdA (5'R ●, 5'S ●) in aqueous N<sub>2</sub>O saturated of ct-DNA. Each data point represents the mean of n=3 independent experiments and the uncertainties are the standard errors. The values obtained from each independent experiment were normalized by subtracting the background levels of the lesions (Taken from Ref. [33]).

**Table S5.** Sequences and molecular masses of the synthesized ODNs

| Strands            | Sequence (5'- 3')          | Mass calcd (Da) | Mass <sup>a</sup> found (Da) |
|--------------------|----------------------------|-----------------|------------------------------|
| ODN-5              | GGG (TTA GGG) <sub>3</sub> | 6653.40         | 6653.40                      |
| ODN-6 <sup>b</sup> | CCC(TAA CCC) <sub>3</sub>  | 6200.10         | 6199.40                      |

<sup>a</sup>All the oligonucleotide masses were obtained by ESI in negative mode. <sup>b</sup> Complementary strand

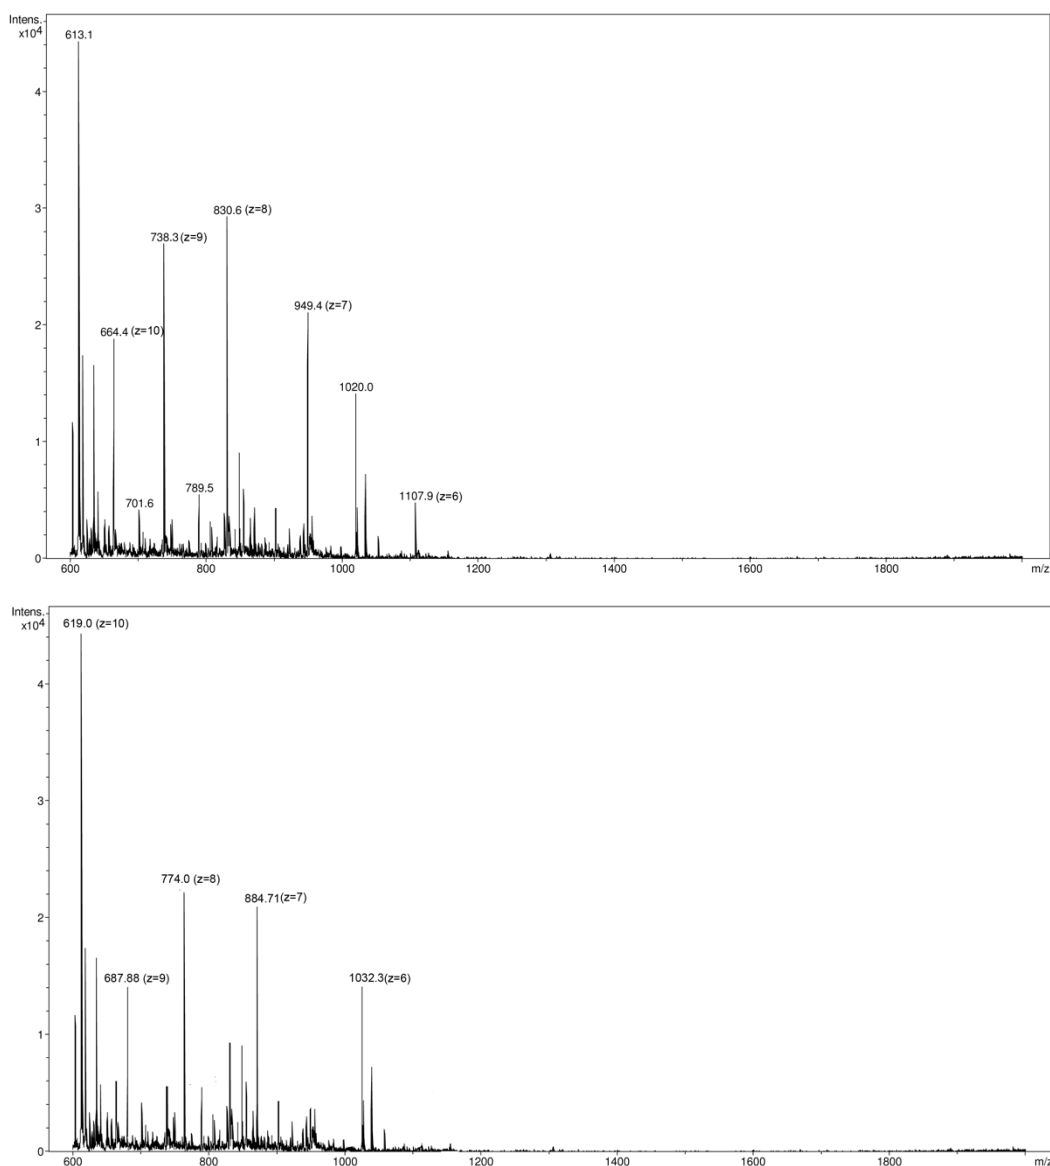

**Figure S7.** ESI spectra of ODN5 (upper part) and ODN6 (lower part). ESI spectra of DNA strands were measured in flow injection 5  $\mu$ L sample (25  $\mu$ M DNA, 2.5 mM diammonium citrate) were injected in a steady flow of H<sub>2</sub>O:ACN; 90:10 (200  $\mu$ L/min). The capillary temperature was 300°C, spray voltage 3.5 KV (negative mode).



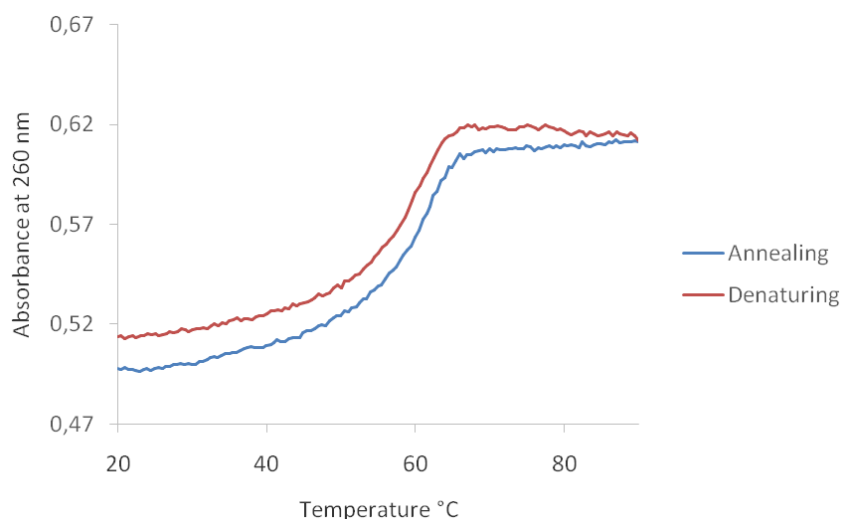

**Figure S8.** UV melting curves of 21-mer duplexes. The oligonucleotide strand 5'-d[GGG(TTA GGG)]<sub>3</sub>-3 (ODN-5), was annealed to the complementary strand in equimolar concentration in buffer solution containing 50 mM sodium phosphate, pH 7.2. The substrate was constructed by heating the two strands at 90°C for 10 min and subsequently allowing the temperature to slowly drop down to the room temperature (25 °C). Melting temperature ( $T_m$ ) of the substrate was measured with a Cary 100 UV/Vis spectrometer using a 1 mL quartz cuvette with a 1 cm pathlength. This allowed to monitor the absorbance of the solutions at 260 nm as a function of temperature. The temperature cycle was recorded from 20 to 90 °C with a temperature controller at a heating rate of 0.3°C/min.  $T_m = 60^\circ\text{C}$

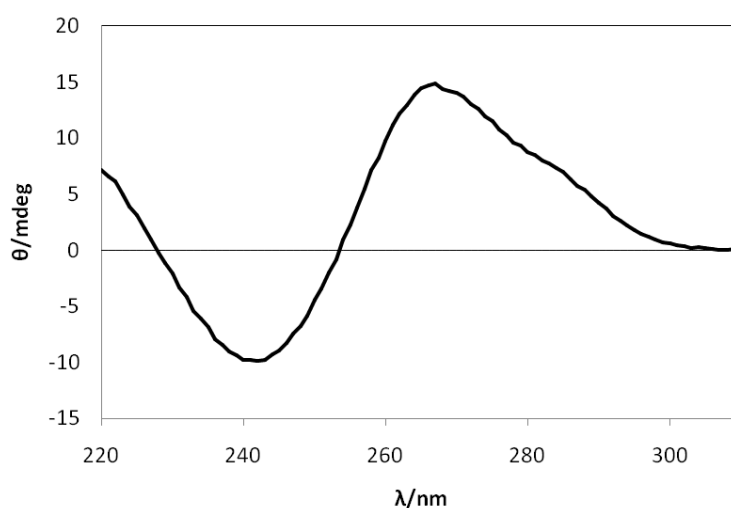

**Figure S9.** CD spectra were recorded on a *Jasco J-710* spectropolarimeter using a quartz cuvette (0.1 cm optical path length) at a scanning speed of 50 nm/min with 1 s response time. Measurements at the range of 200-360 nm were the average of four accumulations at 295 K and smoothed with Origin, Version 8.00 program. The sample contained an aqueous solution of 50 mM sodium phosphate, pH 7.2 and 50  $\mu\text{M}$  double stranded oligonucleotide substrates. The reported spectrum was obtained by subtracting the spectrum of blank (aqueous solution of sodium phosphate buffer).

**Table S6.** Total amount of 8-oxo-dG, 8-oxo-dA, 5'S-cdG, 5'S-cdA, 5'R-cdG and 5'R-cdA (lesions/10<sup>7</sup> dG or dA) in double-stranded 21-mer oligonucleotides. Each sample was exposed to 0, 20, 40 and 60 Gy dose in N<sub>2</sub>O-saturated aqueous solutions; The values represent the mean value  $\pm$  SD of n=3 independent experiments.

| Lesions  | 0 Gy          | 20 Gy            | 40 Gy             | 60 Gy             |
|----------|---------------|------------------|-------------------|-------------------|
| 8-oxo-dG | 0.0 $\pm$ 0.0 | 239.3 $\pm$ 74.9 | 623.3 $\pm$ 145.9 | 776.0 $\pm$ 201.9 |
| 8-oxo-dA | 0.0 $\pm$ 0.0 | 48.3 $\pm$ 1.5   | 73.1 $\pm$ 12.7   | 124.9 $\pm$ 41.1  |
| 5'S-cdG  | 0.0 $\pm$ 0.0 | 9.8 $\pm$ 1.2    | 27.1 $\pm$ 6.7    | 51.1 $\pm$ 11.5   |
| 5'S-cdA  | 0.0 $\pm$ 0.0 | 29.2 $\pm$ 14.7  | 43.3 $\pm$ 9.6    | 96.5 $\pm$ 10.1   |
| 5'R-cdG  | 0.0 $\pm$ 0.0 | 6.1 $\pm$ 2.1    | 11.4 $\pm$ 4.0    | 22.0 $\pm$ 3.4    |
| 5'R-cdA  | 0.0 $\pm$ 0.0 | 36.5 $\pm$ 5.9   | 51.3 $\pm$ 16.6   | 102.3 $\pm$ 18.2  |

**Table S7.** The levels (lesions/10<sup>6</sup> dG or 10<sup>6</sup> dA) of 8-oxo-dG, 8-oxo-dA, 5'R-cdG, 5'S-cdG, 5'R-cdA and 5'S-cdA upon Fenton-type reagent treatment of ds-ODNs. The numbers in the boxes represent the values of DNA lesions levels from the measurement of each sample.

| CuCl <sub>2</sub> ( $\mu$ M)/H <sub>2</sub> O <sub>2</sub> ( $\mu$ M)/Ascorbate (mM) | 8-oxo-dG | 8-oxo-dA | 5'R-cdG | 5'S-cdG | 5'R-cdA | 5'S-cdA |
|--------------------------------------------------------------------------------------|----------|----------|---------|---------|---------|---------|
| 5/40/0.4                                                                             | 65.96    | 14.92    | 2.70    | 2.90    | 3.43    | 2.17    |
| 5/40/0.4                                                                             | 58.97    | 14.35    | 1.86    | 2.58    | 3.17    | 2.61    |
| 5/40/0.4                                                                             | 63.24    | 26.52    | 2.59    | 3.02    | 4.52    | 3.04    |
| 10/80/0.8                                                                            | 12.78    | 22.49    | 5.50    | 8.90    | 6.19    | 5.20    |
| 10/80/0.8                                                                            | 110.75   | 21.79    | 6.60    | 7.82    | 8.78    | 4.86    |
| 10/80/0.8                                                                            | 102.70   | 17.13    | 6.28    | 8.87    | 8.60    | 4.35    |
| 15/120/1.2                                                                           | 202.20   | 33.33    | 9.75    | 13.49   | 14.50   | 8.92    |
| 15/120/1.2                                                                           | 265.77   | 38.09    | 10.73   | 14.15   | 14.03   | 8.42    |
| 15/120/1.2                                                                           | 237.75   | 38.71    | 9.79    | 13.05   | 13.31   | 9.24    |

**Table S8.** Total amount of 8-oxo-purine lesions and cPu lesions (lesions/10<sup>6</sup> dG or 10<sup>6</sup> dA) upon Fenton-type reagent treatment of ds-ODNs. The numbers in the boxes represent the mean value ( $\pm$  standard deviation) of DNA lesions levels from the measurement of three samples.

| <b>CuCl<sub>2</sub> (<math>\mu</math>M)/H<sub>2</sub>O<sub>2</sub> (<math>\mu</math>M)/Ascorbate (mM)</b> | <b>8-oxo-dG</b>    | <b>8-oxo-dA</b>  | <b>5'R-cdG</b>   | <b>5'S-cdG</b>   | <b>5'R-cdA</b>   | <b>5'S-cdA</b>  |
|-----------------------------------------------------------------------------------------------------------|--------------------|------------------|------------------|------------------|------------------|-----------------|
| 5/40/0.4                                                                                                  | 62.72 $\pm$ 3.52   | 18.60 $\pm$ 6.87 | 2.38 $\pm$ 0.46  | 2.83 $\pm$ 0.23  | 3.71 $\pm$ 0.72  | 2.60 $\pm$ 0.43 |
| 10/80/0.8                                                                                                 | 113.74 $\pm$ 12.80 | 20.47 $\pm$ 2.92 | 6.13 $\pm$ 0.57  | 8.53 $\pm$ 0.61  | 7.86 $\pm$ 1.45  | 4.80 $\pm$ 0.43 |
| 15/120/1.2                                                                                                | 235.24 $\pm$ 31.86 | 36.71 $\pm$ 2.94 | 10.09 $\pm$ 0.56 | 13.56 $\pm$ 0.55 | 13.95 $\pm$ 0.60 | 8.86 $\pm$ 0.41 |

**Table S9.** The diastereoisomeric ratios (5'R/5'S) for both cdG and cdA upon Fenton-type reagent treatment of ds-ODNs and. The numbers in the boxes represent the mean value ( $\pm$  standard deviation) of DNA lesions levels from the measurement of three samples.

| <b>CuCl<sub>2</sub> (<math>\mu</math>M)/H<sub>2</sub>O<sub>2</sub> (<math>\mu</math>M)/Ascorbate (mM)</b> | <b>5'R/5'S ratio for cdG</b> | <b>5'R/5'S ratio for cdA</b> |
|-----------------------------------------------------------------------------------------------------------|------------------------------|------------------------------|
| 5/40/0.4                                                                                                  | 0.84 $\pm$ 0.11              | 1.43 $\pm$ 0.19              |
| 10/80/0.8                                                                                                 | 0.72 $\pm$ 0.11              | 1.66 $\pm$ 0.41              |
| 15/120/1.2                                                                                                | 0.74 $\pm$ 0.02              | 1.58 $\pm$ 0.12              |

**Table S10.** The levels (lesions/10<sup>6</sup> dG or 10<sup>6</sup> dA) of 8-oxo-dG, 8-oxo-dA, 5'R-cdG, 5'S-cdG, 5'R-cdA and 5'S-cdA upon treatment of ds-ODNs with CuCl<sub>2</sub> (15 uM), H<sub>2</sub>O<sub>2</sub> (120 uM), Ascorbate (1.2 mM) at 20 min, 40 min, 60 min, 90 min and 120 min. The numbers in the boxes represent the values of DNA lesions levels from the measurement of each sample.

| time (min) | 8-oxo-dG | 8-oxo-dA | 5'R-cdG | 5'S-cdG | 5'R-cdA | 5'S-cdA |
|------------|----------|----------|---------|---------|---------|---------|
| 20         | 98.20    | 14.29    | 4.70    | 5.57    | 8.06    | 5.83    |
| 20         | 74.70    | 20.60    | 6.00    | 6.96    | 7.91    | 3.48    |
| 40         | 187.14   | 19.46    | 7.39    | 9.51    | 11.95   | 6.32    |
| 40         | 112.17   | 27.95    | 7.34    | 10.50   | 8.36    | 5.17    |
| 60         | 283.86   | 23.38    | 11.56   | 14.31   | 13.01   | 6.96    |
| 60         | 223.60   | 40.76    | 11.29   | 15.81   | 12.10   | 10.65   |
| 90         | 399.59   | 55.17    | 10.72   | 15.19   | 19.64   | 18.10   |
| 90         | 290.21   | 47.19    | 14.27   | 14.08   | 19.14   | 13.13   |
| 120        | 984.60   | 82.39    | 22.70   | 20.58   | 27.80   | 17.58   |
| 120        | 643.22   | 70.47    | 19.75   | 26.06   | 23.46   | 15.14   |

**Table S11.** Total amount of 8-oxo-purine lesions and cPu lesions (lesions/10<sup>6</sup> dG or 10<sup>6</sup> dA) formation upon treatment of ds-ODNs with CuCl<sub>2</sub> (15 uM), H<sub>2</sub>O<sub>2</sub> (120 uM), Ascorbate (1.2 mM) at 20 min, 40 min, 60 min, 90 min and 120 min. The numbers in the boxes represent the mean value ( $\pm$  standard deviation) of DNA lesions levels from the measurement of two samples.

| Time (min) | 8-oxo-dG            | 8-oxo-dA          | 5'R-cdG          | 5'S-cdG          | 5'R-cdA          | 5'S-cdA          |
|------------|---------------------|-------------------|------------------|------------------|------------------|------------------|
| 20         | 86.45 $\pm$ 16.62   | 17.45 $\pm$ 4.46  | 5.35 $\pm$ 0.92  | 6.26 $\pm$ 0.98  | 7.99 $\pm$ 0.11  | 4.65 $\pm$ 1.66  |
| 40         | 149.66 $\pm$ 53.01  | 23.71 $\pm$ 6.00  | 7.37 $\pm$ 0.03  | 10.00 $\pm$ 0.71 | 10.16 $\pm$ 2.54 | 5.75 $\pm$ 0.82  |
| 60         | 253.73 $\pm$ 42.60  | 32.07 $\pm$ 12.29 | 11.42 $\pm$ 0.19 | 15.06 $\pm$ 1.06 | 12.55 $\pm$ 0.64 | 8.81 $\pm$ 2.62  |
| 90         | 344.90 $\pm$ 77.34  | 51.18 $\pm$ 5.64  | 12.49 $\pm$ 2.51 | 14.64 $\pm$ 0.79 | 19.39 $\pm$ 0.35 | 15.61 $\pm$ 3.51 |
| 120        | 813.91 $\pm$ 241.39 | 76.43 $\pm$ 8.43  | 21.23 $\pm$ 2.09 | 23.32 $\pm$ 3.88 | 25.63 $\pm$ 3.07 | 16.36 $\pm$ 1.73 |

**Table S12:** The diastereoisomeric ratios (5'R/5'S) for both cdG and cdA upon treatment of ds-ODNs with CuCl<sub>2</sub> (15  $\mu$ M), H<sub>2</sub>O<sub>2</sub> (120  $\mu$ M), Ascorbate (1.2 mM) at 20, 40, 60, 90 and 120 min. The numbers in the boxes represent the mean value ( $\pm$  standard deviation) of DNA lesions levels from the measurement of two samples.

| Time (min) | 5'R/5'S ratio for cdG | 5'R/5'S ratio for cdA |
|------------|-----------------------|-----------------------|
| 20         | 0.85 $\pm$ 0.01       | 1.83 $\pm$ 0.63       |
| 40         | 0.74 $\pm$ 0.01       | 1.75 $\pm$ 0.19       |
| 60         | 0.76 $\pm$ 0.07       | 1.50 $\pm$ 0.52       |
| 90         | 0.86 $\pm$ 0.22       | 1.27 $\pm$ 0.26       |
| 120        | 0.91 $\pm$ 0.24       | 1.57 $\pm$ 0.02       |

**Table S13.** The levels (lesions/10<sup>6</sup> dG or 10<sup>6</sup> dA) of 8-oxo-dG, 8-oxo-dA, 5'R-cdG, 5'S-cdG, 5'R-cdA and 5'S-cdA upon treatment of ds-ODNs with Fe<sup>2+</sup> (15  $\mu$ M), H<sub>2</sub>O<sub>2</sub> (120  $\mu$ M), Ascorbate (1.2 mM) at 30, 60, 90 and 120 min. The numbers in the boxes represent the values of DNA lesions levels from the measurement of each sample.

| Time (min) | 8-oxo-dG | 8-oxo-dA | 5'R-cdG | 5'S-cdG | 5'R-cdA | 5'S-cdA |
|------------|----------|----------|---------|---------|---------|---------|
| 30         | 113.01   | 23.03    | 5.08    | 6.15    | 12.00   | 6.89    |
| 30         | 110.16   | 14.14    | 5.32    | 6.66    | 7.63    | 5.94    |
| 60         | 214.29   | 42.85    | 8.84    | 16.00   | 13.22   | 12.00   |
| 60         | 309.74   | 29.36    | 8.96    | 18.18   | 15.78   | 8.69    |
| 90         | 364.47   | 35.67    | 14.34   | 19.66   | 19.52   | 15.06   |
| 90         | 496.66   | 60.24    | 10.21   | 19.49   | 21.09   | 12.19   |
| 120        | 965.48   | 51.31    | 22.98   | 26.05   | 26.22   | 17.95   |
| 120        | 978.92   | 65.89    | 23.77   | 25.42   | 26.34   | 18.20   |

**Table S14.** Total amount of 8-oxo-purine lesions and cPu lesions (lesions/10<sup>6</sup> dG or 10<sup>6</sup> dA) formation upon treatment of ds-ODNs with Fe<sup>2+</sup> (15 uM), H<sub>2</sub>O<sub>2</sub> (120 uM), Ascorbate (1.2 mM) at 30, 60, 90 and 120 min. The numbers in the boxes represent the mean value ( $\pm$  standard deviation) of DNA lesions levels from the measurement of two samples.

| <b>Time (min)</b> | <b>8-oxo-dG</b>    | <b>8-oxo-dA</b>   | <b>5'R-cdG</b>   | <b>5'S-cdG</b>   | <b>5'R-cdA</b>   | <b>5'S-cdA</b>   |
|-------------------|--------------------|-------------------|------------------|------------------|------------------|------------------|
| <b>30</b>         | 111.58 $\pm$ 2.01  | 18.58 $\pm$ 6.29  | 5.20 $\pm$ 0.17  | 6.41 $\pm$ 0.37  | 9.82 $\pm$ 3.10  | 6.41 $\pm$ 0.67  |
| <b>60</b>         | 262.01 $\pm$ 67.50 | 36.10 $\pm$ 9.54  | 8.90 $\pm$ 0.09  | 17.09 $\pm$ 1.54 | 14.50 $\pm$ 1.81 | 10.34 $\pm$ 2.34 |
| <b>90</b>         | 430.57 $\pm$ 93.47 | 47.95 $\pm$ 17.38 | 12.28 $\pm$ 2.92 | 19.58 $\pm$ 0.12 | 20.31 $\pm$ 1.11 | 13.62 $\pm$ 2.03 |
| <b>120</b>        | 972.20 $\pm$ 9.50  | 58.60 $\pm$ 10.31 | 23.38 $\pm$ 0.56 | 25.73 $\pm$ 0.44 | 26.28 $\pm$ 0.09 | 1.08 $\pm$ 0.18  |

**Table S15.** The diastereoisomeric ratios (5'R/5'S) for both cdG and cdA upon treatment of ds-ODNs with Fe<sup>2+</sup> (15 uM), H<sub>2</sub>O<sub>2</sub> (120 uM), Ascorbate (1.2 mM) at 30, 60, 90 and 120 min. The numbers in the boxes represent the mean value ( $\pm$  standard deviation) of DNA lesions levels from the measurement of two samples.

| <b>Time (min)</b> | <b>5'R/5'S ratio for cdG</b> | <b>5'R/5'S ratio for cdA</b> |
|-------------------|------------------------------|------------------------------|
| 30                | 0.81 $\pm$ 0.02              | 1.51 $\pm$ 0.33              |
| 60                | 0.52 $\pm$ 0.04              | 1.46 $\pm$ 0.50              |
| 90                | 0.63 $\pm$ 0.15              | 1.51 $\pm$ 0.31              |
| 120               | 0.91 $\pm$ 0.04              | 1.45 $\pm$ 0.01              |
